# Supplementary material for: Suppressor of cytokine signaling (SOCS)5 ameliorates influenza infection via inhibition of EGFR signaling
Source: eLife journal article supplement (doi:10.7554/elife.20444), 2017-02-14
Supplement: supp [file elife-20444-supp-v1.zip]

Archive with 8 entries (8 files):
- elife_poa_e20444_Figure_2_Figure_Supplement_1.pdf
- elife_poa_e20444_Figure_6_Figure_Supplement_2.pdf
- elife_poa_e20444_Figure_6_Figure_Supplement_3.pdf
- elife_poa_e20444_Figure_1_Figure_Supplement_1.pdf
- elife_poa_e20444_Figure_6_Figure_Supplement_1.pdf
- elife_poa_e20444_Figure_2_Figure_Supplement_2.pdf
- elife_poa_e20444_Figure_6_figure_supplement_4.pdf
- elife_poa_e20444_Figure_6_figure_supplement_5.pdf
