# Supplementary figures and images for: Suppressor of cytokine signaling (SOCS)5 ameliorates influenza infection via inhibition of EGFR signaling
Source: eLife journal article supplement (doi:10.7554/elife.20444), 2017-02-14

Figure 2 - figure supplement 2

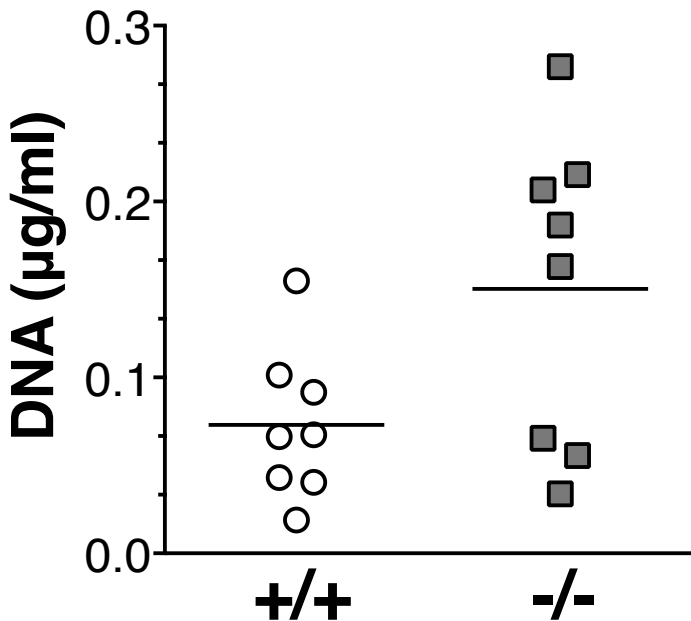

Supplement: supp [file elife-20444-supp-v1.zip]

Figure 6 - figure supplement 4

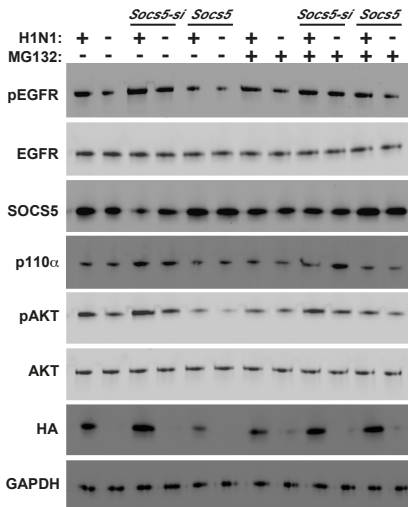

Supplement: supp [file elife-20444-supp-v1.zip]

Figure 6-figure supplement 1

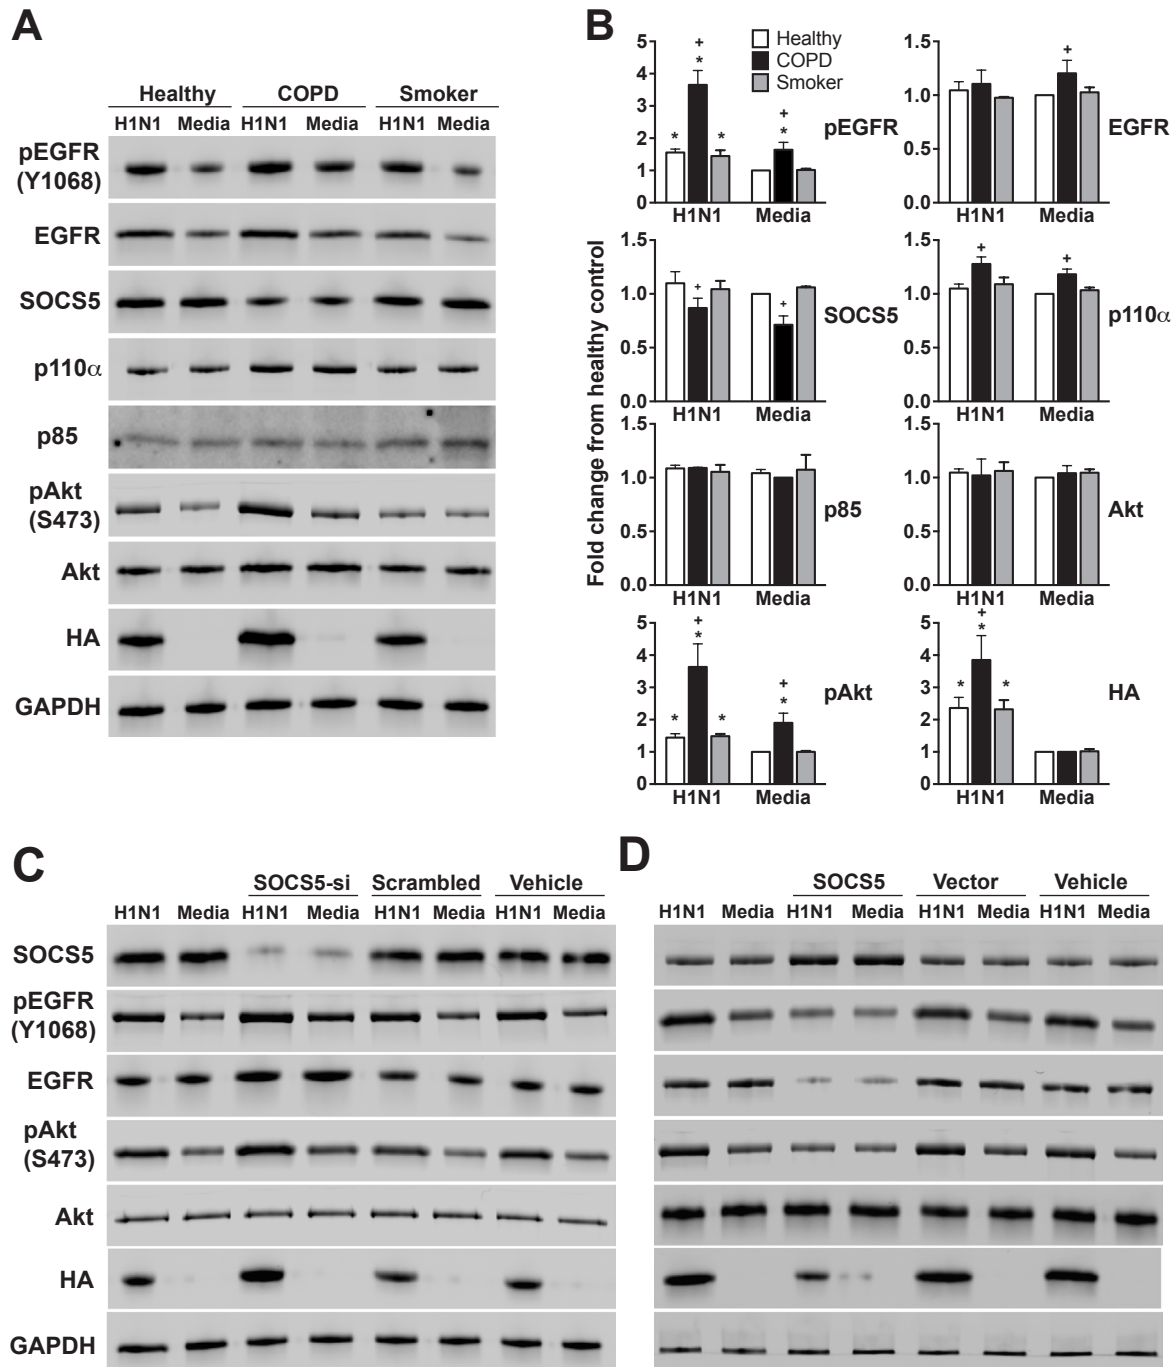

Supplement: supp [file elife-20444-supp-v1.zip]

Figure 6 - figure supplement 3

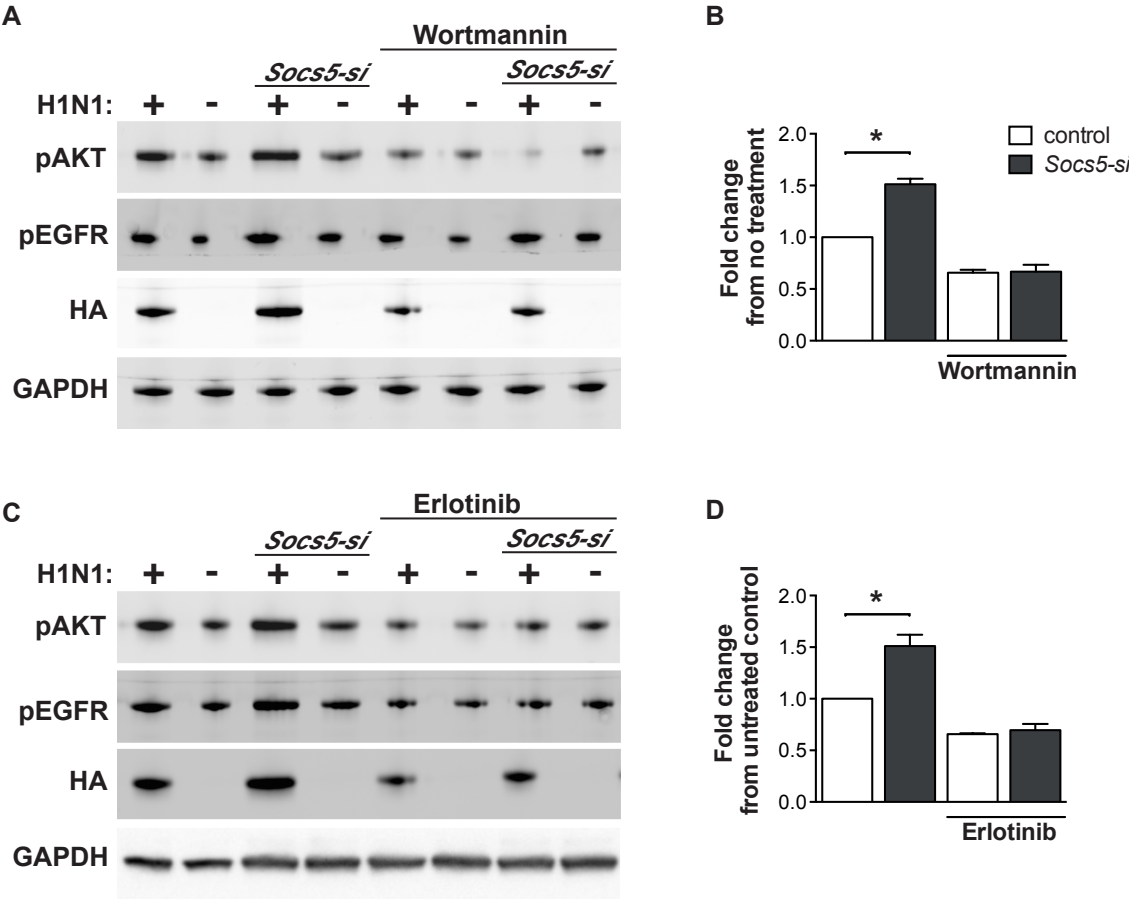

Supplement: supp [file elife-20444-supp-v1.zip]

Figure 6 - figure supplement 2

Fold change from untreated control

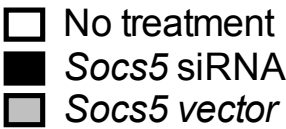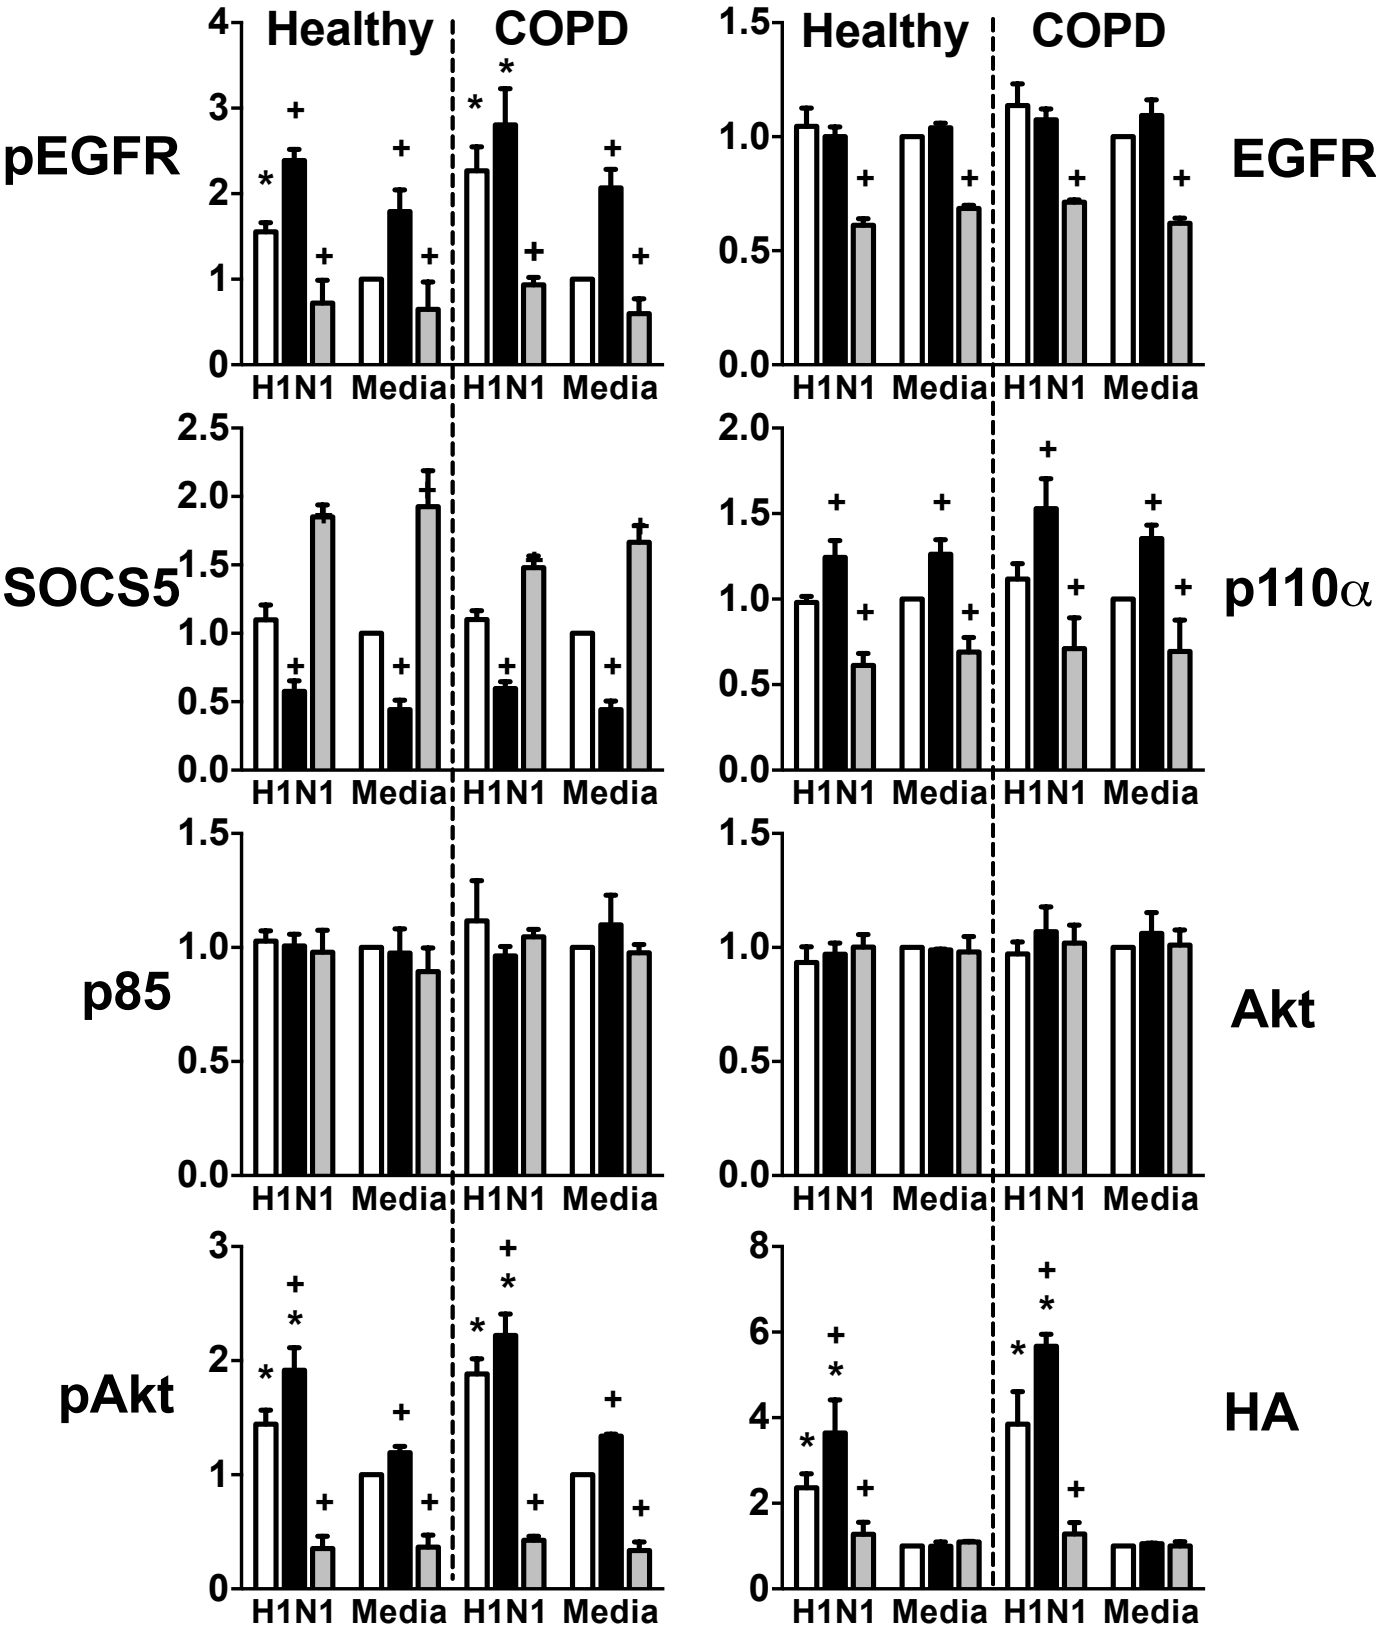

Supplement: supp [file elife-20444-supp-v1.zip]

Figure 2 - figure supplement 1

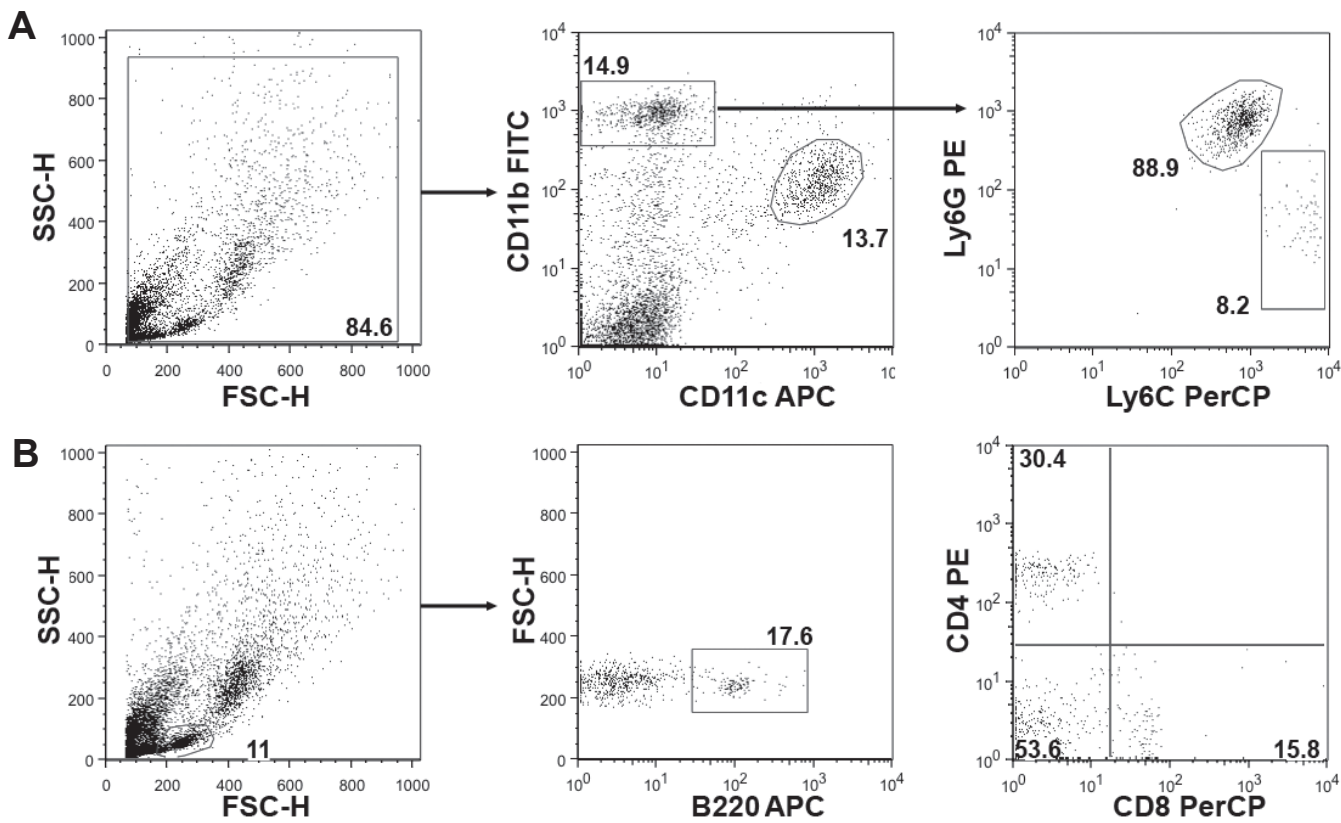

Supplement: supp [file elife-20444-supp-v1.zip]

Figure 1 - figure supplement 1

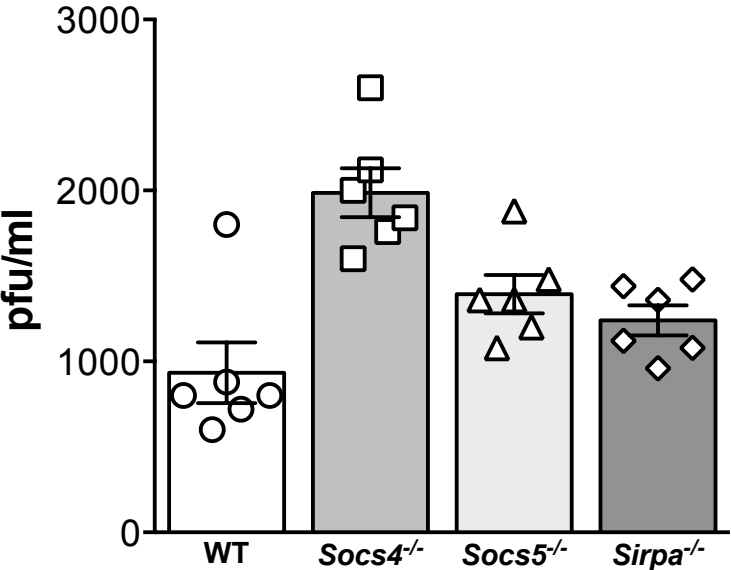

Supplement: supp [file elife-20444-supp-v1.zip]

Figure 6 - figure supplement 5

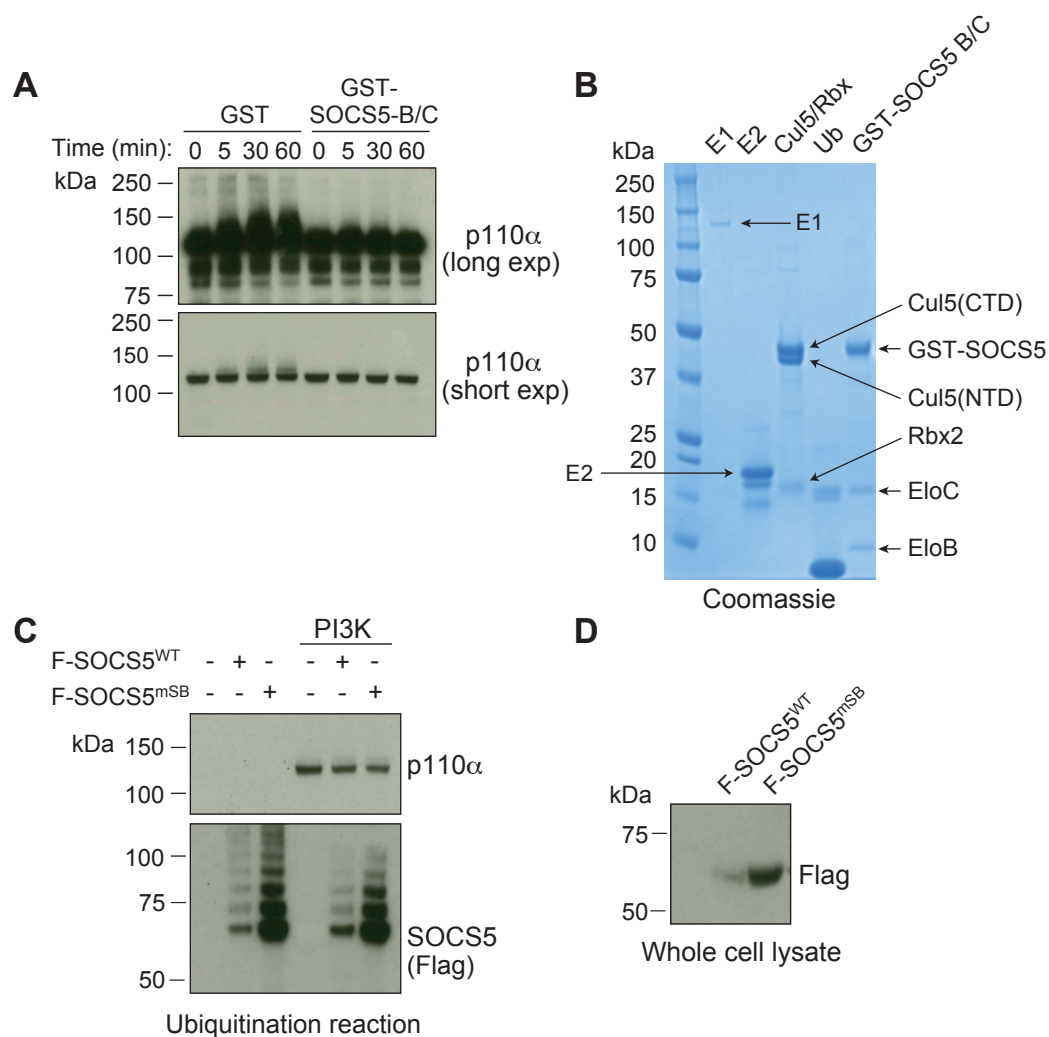

Supplement: supp [file elife-20444-supp-v1.zip]
